# Supplementary material for: New agri-environmental measures have a direct effect on wildlife and economy on conventional agricultural land
Source: PeerJ. 2023 Mar 21;11:e15000. doi: 10.7717/peerj.15000 (PMC10038087; doi:10.7717/peerj.15000)
Supplement: Data S1 [file peerj-11-15000-s001.xlsx]

## Sheet: VVP
			Items to be added are in blue
			Results are in yellow
		Add investment costs:	222				What is VVP? (before the final calculation, it is sufficient to close the desired VVP within an interval of 10%)
		Recommended disc. rate:	see C10, C11, C12 etc…				(VVP for farmers can be compared for a) at the level of risk-free appreciation, b) at the level of interest from the loan in case the land was financed on a loan, c) WACC)
		Year	1	2	3	4	5	6	7	8	9	10	SHCF	CSH
		CF	80	111	120	120	130	130	130	130	130	130
		0.2	66.6667	77.0833	69.4444	57.8704	52.2441	43.5367	36.2806	30.2338	25.1949	20.9957	479.551	257.551
		0.3	61.5385	65.6805	54.6199	42.0153	35.0128	26.9329	20.7176	15.9366	12.2589	9.42996	344.143	122.143
		0.5	53.3333	49.3333	35.5556	23.7037	17.1193	11.4129	7.6086	5.0724	3.3816	2.2544	208.775	-13.2248
		0.6	50	43.3594	29.2969	18.3105	12.3978	7.7486	4.84288	3.0268	1.89175	1.18234	172.057	-49.9431
		0.7	47.0588	38.4083	24.425	14.3676	9.15585	5.3858	3.16811	1.8636	1.09623	0.644843	145.574	-76.4258
		0.73	46.2428	37.0878	23.1762	13.3967	8.38905	4.84916	2.80298	1.62022	0.936545	0.541355	139.043	-82.9572
		0.74	45.977	36.6627	22.7789	13.0913	8.15074	4.68433	2.69215	1.54721	0.889201	0.511035	136.985	-85.0153
		0.75	45.7143	36.2449	22.3907	12.7947	7.92051	4.52601	2.58629	1.47788	0.844502	0.482573	134.982	-87.0177
		0.9	42.1053	30.7479	17.4953	9.20803	5.25019	2.76326	1.45435	0.765446	0.402866	0.212035	110.405	-111.595
											disc. rate	CSH		VVP
										in	0.74	1.34507	CSHn	0.7477
										iv	0.75	-0.408962	CSHv

## Sheet: A VVP
			Items to be added are in blue
			Results are in yellow
		Add investment costs:	390000				What is VVP? (before the final calculation, it is sufficient to close the desired VVP within an interval of 10%)
		Recommended disc. rate:	X				(VVP for farmers can be compared for a) at the level of risk-free appreciation, b) at the level of interest from the loan in case the land was financed on a loan, c) WACC)
		Year	1	2	3	4	5	6	7	8	9	10	11	12	13	14	15	SHCF	CSH
		CF	17246.8	17246.8	17246.8	17246.8	17246.8	17246.8	17246.8	17246.8	17246.8	17246.8	17246.8	17246.8	17246.8	17246.8	17246.8
	VVP A Biostrip:	-0.04741	18105.2	19006.3	19952.2	20945.2	21987.6	23081.9	24230.7	25436.7	26702.7	28031.6	29426.8	30891.3	32428.8	34042.7	35737	390007	6.61137
											disc. rate	CSH		VVP
										in	0.74	1.34507	CSHn
										iv	0.75	-0.408962	CSHv

## Sheet: B VVP
			Items to be added are in blue
			Results are in yellow
		Add investment costs:	650000				What is VVP? (before the final calculation, it is sufficient to close the desired VVP within an interval of 10%)
		Recommended disc. rate:	see C10, C11, C12 etc…				(VVP for farmers can be compared for a) at the level of risk-free appreciation, b) at the level of interest from the loan in case the land was financed on a loan, c) WACC)
		Year	1	2	3	4	5	6	7	8	9	10	11	12	13	14	15	SHCF	CSH
		CF	18482.6	18482.6	18482.6	18482.6	18482.6	18482.6	18482.6	18482.6	18482.6	18482.6	18482.6	18482.6	18482.6	18482.6	18482.6
	VVP B Orchard:	-0.0914915	20343.9	22392.7	24647.7	27129.9	29862	32869.3	36179.4	39822.8	43833.2	48247.4	53106.2	58454.2	64340.9	70820.4	77952.3	650002	2.31055
		0.008	18336	18190.4	18046.1	17902.8	17760.8	17619.8	17480	17341.2	17203.6	17067.1						176948	-473052
		0.5	12321.8	8214.51	5476.34	3650.89	2433.93	1622.62	1081.75	721.164	480.776	320.517						36324.2	-613676
		0.6	11551.6	7219.78	4512.36	2820.23	1762.64	1101.65	688.532	430.332	268.958	168.099						30524.2	-619476
		0.7	10872.1	6395.38	3761.99	2212.93	1301.73	765.721	450.424	264.955	155.856	91.68						26272.8	-623727
		0.73	10683.6	6175.5	3569.65	2063.38	1192.71	689.426	398.512	230.354	133.152	76.9667						25213.3	-624787
		0.74	10622.2	6104.72	3508.46	2016.36	1158.82	665.991	382.754	219.973	126.421	72.656						24878.4	-625122
		0.75	10561.5	6035.15	3448.66	1970.66	1126.09	643.481	367.703	210.116	120.066	68.6094						24552	-625448
		0.9	9727.71	5119.84	2694.66	1418.24	746.442	392.864	206.771	108.827	57.2772	30.1459						20502.8	-629497
											disc. rate	CSH		VVP
										in	0.74	1.34507	CSHn	0.7477
										iv	0.75	-0.408962	CSHv

## Sheet: C VVP
			Items to be added are in blue
			Results are in yellow
		Add investment costs:	375000				What is VVP? (before the final calculation, it is sufficient to close the desired VVP within an interval of 10%)
		Recommended disc. rate:	see C10, C11, C12 etc…				(VVP for farmers can be compared for a) at the level of risk-free appreciation, b) at the level of interest from the loan in case the land was financed on a loan, c) WACC)
		Year	1	2	3	4	5	6	7	8	9	10	11	12	13	14	15	SHCF	CSH
		CF	3204.2	7979	7979	7979	7979	3204.2	7979	7979	7979	7979	3204.2	7979	7979	7979	7979
	VVP C Mixture:	-0.125579	3664.37	10435.4	11934	13647.9	15607.9	7167.97	20412.9	23344.5	26697	30531.1	14021.5	39930.2	45664.7	52222.8	59722.7	375005	5.04282
											disc. rate	CSH		VVP
										in	0.74	1.34507	CSHn	0.7477
										iv	0.75	-0.408962	CSHv

## Sheet: D VVP
			Items to be added are in blue
			Results are in yellow
		Add investment costs:	390000				What is VVP? (before the final calculation, it is sufficient to close the desired VVP within an interval of 10%)
		Recommended disc. rate:	see C10, C11, C12 etc…				(VVP for farmers can be compared for a) at the level of risk-free appreciation, b) at the level of interest from the loan in case the land was financed on a loan, c) WACC)
		Year	1	2	3	4	5	6	7	8	9	10	11	12	13	14	15	SHCF	CSH
		CF	22085.8	22085.8	22085.8	22085.8	22085.8	22085.8	22085.8	22085.8	22085.8	22085.8	22085.8	22085.8	22085.8	22085.8	22085.8
	VVP D Wheat:	-0.019735	22530.5	22984.1	23446.8	23918.8	24400.4	24891.6	25392.7	25903.9	26425.5	26957.5	27500.2	28053.8	28618.6	29194.8	29782.5	390002	1.62666
											disc. rate	CSH		VVP
										in	0.74	1.34507	CSHn	0.7477
										iv	0.75	-0.408962	CSHv

## Sheet: E VVP
			Items to be added are in blue
			Results are in yellow
		Add investment costs:	390000				What is VVP? (before the final calculation, it is sufficient to close the desired VVP within an interval of 10%)
		Recommended disc. rate:	see C10, C11, C12 etc…				(VVP for farmers can be compared for a) at the level of risk-free appreciation, b) at the level of interest from the loan in case the land was financed on a loan, c) WACC)
		Year	1	2	3	4	5	6	7	8	9	10	11	12	13	14	15	SHCF	CSH
		CF	27269.5	27269.5	27269.5	27269.5	27269.5	27269.5	27269.5	27269.5	27269.5	27269.5	27269.5	27269.5	27269.5	27269.5	27269.5
	VVP E Rape:	0.00602	27106.3	26944.1	26782.9	26622.6	26463.3	26305	26147.5	25991.1	25835.5	25680.9	25527.3	25374.5	25222.7	25071.7	24921.7	389997	-2.76828
		0.05	25971	24734.2	23556.4	22434.7	21366.4	20348.9	19379.9	18457.1	17578.2	16741.1						210568	-179432
		0.5	18179.7	12119.8	8079.85	5386.57	3591.05	2394.03	1596.02	1064.01	709.342	472.895						53593.2	-336407
		0.6	17043.4	10652.1	6657.59	4161	2600.62	1625.39	1015.87	634.918	396.823	248.015						45035.8	-344964
		0.7	16040.9	9435.81	5550.48	3264.99	1920.58	1129.75	664.561	390.918	229.952	135.266						38763.2	-351237
		0.73	15762.7	9111.4	5266.7	3044.34	1759.73	1017.19	587.969	339.866	196.455	113.558						37199.9	-352800
		0.74	15672.1	9006.97	5176.42	2974.95	1709.74	982.611	564.719	324.551	186.524	107.198						36705.8	-353294
		0.75	15582.6	8904.33	5088.19	2907.54	1661.45	949.399	542.514	310.008	177.147	101.227						36224.4	-353776
		0.9	14352.4	7553.88	3975.73	2092.49	1101.31	579.636	305.072	160.564	84.5074	44.4776						30250	-359750
											disc. rate	CSH		VVP
										in	0.74	1.34507	CSHn	0.7477
										iv	0.75	-0.408962	CSHv

## Sheet: VVP All
		VVP A Biostrip:
		Year	1	2	3	4	5	6	7	8	9	10	11	12	13	14	15	Sum CF	SHCF	VVP
		CF	17246.8	17246.8	17246.8	17246.8	17246.8	17246.8	17246.8	17246.8	17246.8	17246.8	17246.8	17246.8	17246.8	17246.8	17246.8	258702	x
			18105.2	19006.3	19952.2	20945.2	21987.6	23081.9	24230.7	25436.7	26702.7	28031.6	29426.8	30891.3	32428.8	34042.7	35737	x	390007	-0.04741
		VVP B Orchard:
		Year	1	2	3	4	5	6	7	8	9	10	11	12	13	14	15	Sum CF	SHCF	VVP
		CF	18482.6	18482.6	18482.6	18482.6	18482.6	18482.6	18482.6	18482.6	18482.6	18482.6	18482.6	18482.6	18482.6	18482.6	18482.6	277240	x
			20343.9	22392.7	24647.7	27129.9	29862	32869.3	36179.4	39822.8	43833.2	48247.4	53106.2	58454.2	64340.9	70820.4	77952.3		650002	-0.0914915
		VVP C Mixture:
		Year	1	2	3	4	5	6	7	8	9	10	11	12	13	14	15	Sum CF	SHCF	VVP
		CF	3204.2	7979	7979	7979	7979	3204.2	7979	7979	7979	7979	3204.2	7979	7979	7979	7979	105361	x
			3664.37	10435.4	11934	13647.9	15607.9	7167.97	20412.9	23344.5	26697	30531.1	14021.5	39930.2	45664.7	52222.8	59722.7	x	375005	-0.125579
		VVP D Wheat:
		Year	1	2	3	4	5	6	7	8	9	10	11	12	13	14	15	Sum CF	SHCF	VVP
		CF	22085.8	22085.8	22085.8	22085.8	22085.8	22085.8	22085.8	22085.8	22085.8	22085.8	22085.8	22085.8	22085.8	22085.8	22085.8	331288	x
			22530.5	22984.1	23446.8	23918.8	24400.4	24891.6	25392.7	25903.9	26425.5	26957.5	27500.2	28053.8	28618.6	29194.8	29782.5	x	390002	-0.019735
		VVP E Rape:
		Year	1	2	3	4	5	6	7	8	9	10	11	12	13	14	15	Sum CF	SHCF	VVP
		CF	27269.5	27269.5	27269.5	27269.5	27269.5	27269.5	27269.5	27269.5	27269.5	27269.5	27269.5	27269.5	27269.5	27269.5	27269.5	409042	x
			27106.3	26944.1	26782.9	26622.6	26463.3	26305	26147.5	25991.1	25835.5	25680.9	25527.3	25374.5	25222.7	25071.7	24921.7	x	389997	0.00602
		Conversion to EUR			25.625	CZK/EUR
		VVP A Biostrip:
		Year	1	2	3	4	5	6	7	8	9	10	11	12	13	14	15	Sum CF	SHCF	VVP
		CF	673.046	673.046	673.046	673.046	673.046	673.046	673.046	673.046	673.046	673.046	673.046	673.046	673.046	673.046	673.046	10095.7	X
			706.543	741.707	778.622	817.374	858.054	900.759	945.589	992.651	1042.05	1093.92	1148.36	1205.51	1265.51	1328.5	1394.62	X	15219.8	-0.04741
		VVP B Orchard:
		Year	1	2	3	4	5	6	7	8	9	10	11	12	13	14	15	Sum CF	SHCF	VVP
		CF	721.274	721.274	721.274	721.274	721.274	721.274	721.274	721.274	721.274	721.274	721.274	721.274	721.274	721.274	721.274	10819.1	X
			793.91	873.861	961.863	1058.73	1165.35	1282.7	1411.88	1554.06	1710.56	1882.83	2072.44	2281.14	2510.86	2763.72	3042.04	X	25365.9	-0.0914915
		VVP C Mixture:
		Year	1	2	3	4	5	6	7	8	9	10	11	12	13	14	15	Sum CF	SHCF	VVP
		CF	125.042	311.376	311.376	311.376	311.376	125.042	311.376	311.376	311.376	311.376	125.042	311.376	311.376	311.376	311.376	4111.63	X
			143	407.233	465.718	532.601	609.09	279.726	796.6	911.003	1041.84	1191.46	547.179	1558.25	1782.04	2037.96	2330.64	X	14634.3	-0.125579
		VVP D Wheat:
		Year	1	2	3	4	5	6	7	8	9	10	11	12	13	14	15	Sum CF	SHCF	VVP
		CF	861.886	861.886	861.886	861.886	861.886	861.886	861.886	861.886	861.886	861.886	861.886	861.886	861.886	861.886	861.886	12928.3	X
			879.238	896.939	914.997	933.418	952.21	971.38	990.936	1010.89	1031.24	1052	1073.18	1094.78	1116.82	1139.31	1162.24	X	15219.6	-0.019735
		VVP E Rape:
		Year	1	2	3	4	5	6	7	8	9	10	11	12	13	14	15	Sum CF	SHCF	VVP
		CF	1064.18	1064.18	1064.18	1064.18	1064.18	1064.18	1064.18	1064.18	1064.18	1064.18	1064.18	1064.18	1064.18	1064.18	1064.18	15962.6	X
			1057.81	1051.48	1045.19	1038.93	1032.71	1026.53	1020.39	1014.29	1008.22	1002.18	996.186	990.225	984.3	978.41	972.555	X	15219.4	0.00602

## Sheet: CSH, ISH
	Items to be added are in blue
	Results are in yellow				Investment costs		(price for ha)
					A Biostrip	390000
		Add investment costs:	390000		B Orchard	650000
	Recommended disc. rate:	a)	0.0155	rf	C Mixture	375000
		b)	0.0214	rd	D Wheat	390000		What is VVP? (before the final calculation, it is sufficient to close the desired VVP within an interval of 10%)
		c)	0.1174	WACC	E Rape	390000		(VVP for farmers can be compared for a) at the level of risk-free appreciation, b) at the level of interest from the loan in case the land was financed on a loan, c) WACC)
	Setting up formulas for calculations:
	ROK	1	2	3	4	5	6	7	8	9	10	11	12	13	14	15	SHCF	CSH	ISH
	CF	18482.6	18482.6	18482.6	18482.6	18482.6	18482.6	18482.6	18482.6	18482.6	18482.6	18482.6	18482.6	18482.6	18482.6	18482.6
	rf	18200.5	17922.7	17649.2	17379.8	17114.5	16853.3	16596	16342.7	16093.3	15847.6	15605.8	15367.6	15133	14902	14674.6	245683	-144317	0.629955
	rd	18095.4	17716.3	17345.1	16981.7	16625.9	16277.5	15936.5	15602.6	15275.7	14955.7	14642.3	14335.5	14035.2	13741.1	13453.2	235020	-154980	0.602615
	WACC	16540.8	14802.9	13247.6	11855.8	10610.1	9495.37	8497.74	7604.92	6805.91	6090.84	5450.91	4878.2	4365.67	3906.99	3496.5	127650	-262350	0.327308
	Specific calculations:

## Sheet: A CSH,ISH
	Items to be added are in blue
	Results are in yellow				Investment costs		(price for ha)
					A Biostrip	390000
		Add investment costs:	390000		B Orchard	650000
	Recommended disc. rate:	a)	0.0155	rf	C Mixture	375000
		b)	0.0214	rd	D Wheat	390000		What is VVP? (before the final calculation, it is sufficient to close the desired VVP within an interval of 10%)
		c)	0.1174	WACC	E Rape	390000		(VVP for farmers can be compared for a) at the level of risk-free appreciation, b) at the level of interest from the loan in case the land was financed on a loan, c) WACC)
	Setting up formulas for calculations:
	ROK	1	2	3	4	5	6	7	8	9	10	11	12	13	14	15	SHCF	CSH	ISH
	CF	17246.8	17246.8	17246.8	17246.8	17246.8	17246.8	17246.8	17246.8	17246.8	17246.8	17246.8	17246.8	17246.8	17246.8	17246.8
	rf	16983.6	16724.3	16469.1	16217.7	15970.1	15726.4	15486.3	15250	15017.2	14788	14562.3	14340	14121.1	13905.6	13693.3	229255	-160745	0.587833
	rd	16885.5	16531.7	16185.3	15846.2	15514.2	15189.1	14870.9	14559.3	14254.3	13955.6	13663.3	13377	13096.7	12822.3	12553.7	219305	-170695	0.562321
	WACC	15434.8	13813.1	12361.8	11063	9900.68	8860.47	7929.54	7096.42	6350.83	5683.58	5086.43	4552.02	4073.76	3645.75	3262.71	119115	-270885	0.305423
	Specific calculations:

## Sheet: B CSH,ISH
	Items to be added are in blue
	Results are in yellow				Investment costs		(price for ha)
					A Biostrip	390000
		Add investment costs:	650000		B Orchard	650000
	Recommended disc. rate:	a)	0.0155	rf	C Mixture	375000
		b)	0.0214	rd	D Wheat	390000		What is VVP? (before the final calculation, it is sufficient to close the desired VVP within an interval of 10%)
		c)	0.1174	WACC	E Rape	390000		(VVP for farmers can be compared for a) at the level of risk-free appreciation, b) at the level of interest from the loan in case the land was financed on a loan, c) WACC)
	Setting up formulas for calculations:
	ROK	1	2	3	4	5	6	7	8	9	10	11	12	13	14	15	SHCF	CSH	ISH
	CF	18482.6	18482.6	18482.6	18482.6	18482.6	18482.6	18482.6	18482.6	18482.6	18482.6	18482.6	18482.6	18482.6	18482.6	18482.6
	rf	18200.5	17922.7	17649.2	17379.8	17114.5	16853.3	16596	16342.7	16093.3	15847.6	15605.8	15367.6	15133	14902	14674.6	245683	-404317	0.377973
	rd	18095.4	17716.3	17345.1	16981.7	16625.9	16277.5	15936.5	15602.6	15275.7	14955.7	14642.3	14335.5	14035.2	13741.1	13453.2	235020	-414980	0.361569
	WACC	16540.8	14802.9	13247.6	11855.8	10610.1	9495.37	8497.74	7604.92	6805.91	6090.84	5450.91	4878.2	4365.67	3906.99	3496.5	127650	-522350	0.196385
	Specific calculations:

[truncated: 14 more sheets: C CSH,ISH, D CSH,ISH, E CSH,ISH, CSH, ISH VŠE, DDN, A DDN, B DDN, C DDN, D DDN, E DDN, DDN VŠE, Vstupní hodnoty, Vstupy v EUR, Ceny pozemků]
